# Supplementary material for: Hesitancy of Arab Healthcare Workers Towards COVID-19 Vaccination: A Large-Scale Multinational Study
Source: Preprints.org preprint supplement (doi:10.20944/preprints202104.0236.v2), 2021-04-09
Supplement: Supplementary file 1 [file supplementary]

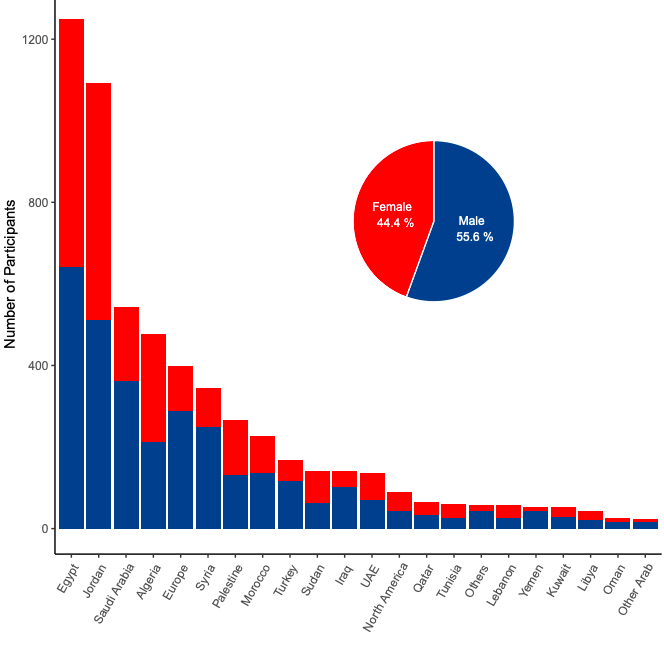


**Supplementary Figure 1.** A bar plot and a pie chart showing distribution of participants according to country of residence and gender.

**Supplementary Table 1.** Comparison between HCW and non-HCW participants

| Label | levels | HCW | | Not HCW | | Total | |
| --- | --- | --- | --- | --- | --- | --- | --- |
|  |  | N | % | N | % | N | % |
| Age | Below 30 | 3033 | 53.1% | 12738 | 41.7% | 15771 | 43.5% |
|  | 30-39 | 1649 | 28.9% | 9916 | 32.5% | 11565 | 31.9% |
|  | 40-49 | 692 | 12.1% | 5227 | 17.1% | 5919 | 16.3% |
|  | 50-59 | 261 | 4.6% | 2040 | 6.7% | 2301 | 6.4% |
|  | Over 59 | 73 | 1.3% | 591 | 1.9% | 664 | 1.8% |
| Chronic Diseases | No | 4908 | 86.0% | 25473 | 83.5% | 30381 | 83.9% |
|  | Yes | 800 | 14.0% | 5039 | 16.5% | 5839 | 16.1% |
| Country | Arab countries | 4996 | 87.5% | 25204 | 82.6% | 30200 | 83.4% |
|  | Other countries | 712 | 12.5% | 5308 | 17.4% | 6020 | 16.6% |
| Academic Education | Higher education | 3875 | 67.9% | 18361 | 60.2% | 22236 | 61.4% |
|  | Lower education | 1833 | 32.1% | 12151 | 39.8% | 13984 | 38.6% |
| Had Covid | No | 2579 | 45.2% | 15546 | 51.0% | 18125 | 50.0% |
|  | Not sure | 1859 | 32.6% | 9599 | 31.5% | 11458 | 31.6% |
|  | Yes | 1270 | 22.2% | 5367 | 17.6% | 6637 | 18.3% |
| Gender | Male | 3171 | 55.6% | 18869 | 61.8% | 22040 | 60.9% |
|  | Female | 2537 | 44.4% | 11643 | 38.2% | 14180 | 39.1% |
| Vaccine Type Unknown | No | 3857 | 67.6% | 17306 | 56.7% | 21163 | 58.4% |
|  | Yes | 1851 | 32.4% | 13206 | 43.3% | 15057 | 41.6% |
| Influenza Vaccine | Yearly | 321 | 5.6% | 587 | 1.9% | 908 | 2.5% |
|  | Some years | 681 | 11.9% | 2230 | 7.3% | 2911 | 8.0% |
|  | Rarely | 712 | 12.5% | 3649 | 12.0% | 4361 | 12.0% |
|  | Never | 3994 | 70.0% | 24046 | 78.8% | 28040 | 77.4% |
| Vaccine Hesitancy | Acceptance | 1522 | 26.7% | 4641 | 15.2% | 6163 | 17.0% |
|  | Hesitance | 4186 | 73.3% | 25871 | 84.8% | 30057 | 83.0% |
|  |  | 5708 | 100.0% | 30512 | 100.0% | 36220 | 100.0% |
